# Supplementary material for: Preparation, Properties and Mechanism of Anionic and Cationic CNC/WPU Composite Films
Source: Research Square preprint supplement (doi:10.21203/rs.3.rs-672111/v1), 2021-09-24
Supplement: Supplementary file 1 [file 8b3f1be3ad653e12c73d84e5.docx]

Supplementary Information

**Preparation, properties and mechanism of anionic and cationic CNCs/WPU composite films**

Ya-Yu Li, Yan-Ru Bai, Xin-Qian Zhang, Xin Liu, Zhen Dai, Hong-Ji Chen, Zun-Qi Liu, Ming-Guo Ma

**Fig. s1** XRD patterns of three kinds of CNCs: TOCNCs, CaCNCs, and SCNCs.

Fig. s1 shows the XRD patterns of three kinds of CNCs: TOCNCs, CaCNCs, and SCNCs. These three CNCs all appeared diffraction peaks at 15.0 o, 16.8 o and 22.9 o. This verified these three CNCs all reserved the cellulose I crystallinity. The small diffraction peak at 10.4 o may come from a few impurities or test deviation of equipment.
